# Supplementary material for: Ozone Pollution Alters Olfaction and Behavior of Pollinators
Source: MDPI journal article supplement (doi:10.3390/antiox10050636), 2021-04-21
Supplement: s1 [file s1]

# Ozone pollution alters olfaction and behavior of pollinators

Maryse Vanderplanck <sup>1,2,\*</sup>, Benoît Lapeyre <sup>3</sup>, Margot Brondani <sup>3</sup>, Manon Opsommer <sup>3</sup>, Mathilde Dufay <sup>3</sup>, Martine Hossaert-McKey <sup>3,4</sup>, Magali Proffit <sup>3</sup>

<sup>1</sup> Université de Lille, CNRS, UMR 8198 – Evo-Eco-Paléo, 59000 Lille, France

<sup>2</sup> Université de Mons, Laboratoire de Zoologie, 7000 Mons, Belgium

<sup>3</sup> Centre d'Écologie Fonctionnelle et Évolutive (CEFE), Université de Montpellier, CNRS, Université Paul Valéry Montpellier 3, EPHE, IRD, 34293 Montpellier, France

<sup>4</sup> Laboratoire de Chimie Bio-inspirée et Innovations Écologiques (CHIMECO), CNRS – Université de Montpellier, 34790 Grabels, France

\* Correspondence: [maryse.vanderplanck@umonts.ac.be](mailto:maryse.vanderplanck@umonts.ac.be), +32 65 37 38 93

**Table S1.** Conditions of ozone exposure and sample sizes for electrophysiological experiments.

| Pollinator species        | Tested VOCs      | Exposure duration (min) | O <sub>3</sub> concentration (ppb) | Sample size (number of individuals) |
|---------------------------|------------------|-------------------------|------------------------------------|-------------------------------------|
| <i>Blastophaga psenes</i> | Linalool mixture | 60                      | 0                                  | 21                                  |
|                           |                  |                         | 200                                | 17                                  |
|                           | Linalool oxides  | 180                     | 0                                  | 12                                  |
|                           |                  |                         | 80                                 | 11                                  |
| Benzyl alcohol            | 180              | 120                     | 11                                 |                                     |
|                           |                  | 0                       | 30                                 |                                     |
| <i>Bombus terrestris</i>  | R-linalool       | 60                      | 80                                 | 30                                  |
|                           |                  |                         | 120                                | 30                                  |
|                           |                  |                         | 200                                | 30                                  |
|                           | Benzaldehyde     | 180                     | 0                                  | 30                                  |
|                           |                  |                         | 80                                 | 30                                  |
|                           |                  |                         | 120                                | 30                                  |
| Nonanal                   | 180              | 200                     | 30                                 |                                     |
|                           |                  | 0                       | 30                                 |                                     |

**Table S2.** Provider, CAS (Chemical Abstracts Service) number and purity of the synthetic VOCs used during the experiments.

| Synthetic VOCs   | Models    | Provider      | CAS number | Purity   |
|------------------|-----------|---------------|------------|----------|
| R-linalool       | Bumblebee | Sigma-Aldrich | 126-91-0   | ≥ 95 %   |
| Linalool mixture | Fig wasp  | Fluka         | 78-70-6    | ~ 97 %   |
| Linalool oxides  | Fig wasp  | Fluka         | 68780-91-6 | > 97 %   |
| Benzyl alcohol   | Fig wasp  | Fluka         | 100-51-6   | > 99.5 % |
| Benzaldehyde     | Bumblebee | Sigma-Aldrich | 100-52-7   | ≥ 99.5 % |
| Nonanal          | Bumblebee | Sigma-Aldrich | 124-19-6   | ≥ 99.5 % |

**Table S3.** Conditions of ozone exposure and sample sizes for behavioral assays.

| Pollinator species        | Tested VOCs                                  | Exposure duration (min) | O <sub>3</sub> concentration (ppb) | Sample size (number of individuals) |
|---------------------------|----------------------------------------------|-------------------------|------------------------------------|-------------------------------------|
| <i>Blastophaga psenes</i> | VOCs mix mimicking the odour of the fig host | 60                      | 0                                  | 49                                  |
|                           |                                              |                         | 120                                | 50                                  |
|                           |                                              |                         | 200                                | 50                                  |
|                           | Benzaldehyde                                 | 180                     | 0                                  | 50                                  |
|                           |                                              |                         | 80                                 | 50                                  |
|                           |                                              |                         | 120                                | 50                                  |
| <i>Bombus terrestris</i>  | Benzaldehyde                                 | 60                      | 0                                  | 30                                  |
|                           |                                              |                         | 80                                 | 30                                  |
|                           |                                              |                         | 120                                | 30                                  |
|                           |                                              |                         | 200                                | 30                                  |

**Table S4.** Statistical outputs (p-values) regarding the impact of ozone exposure on antennal sensitivity in fig wasps. Significant differences are in bold.

| Comparison between 0 and 200 ppb for 60-min exposure |                      |                            |              |       |              |
|------------------------------------------------------|----------------------|----------------------------|--------------|-------|--------------|
| VOCs                                                 |                      | VOC dose ( $\mu\text{g}$ ) |              |       |              |
|                                                      |                      | 1                          | 10           | 100   | 1000         |
| Benzyl alcohol                                       |                      | 0.850                      | 0.928        | 0.067 | <b>0.017</b> |
| Linalool oxides                                      |                      | 0.956                      | 0.782        | 0.190 | 0.133        |
| Linalool mixture                                     |                      | 0.753                      | 0.856        | 0.117 | 0.187        |
| Multiple pairwise comparisons for 180-min exposure   |                      |                            |              |       |              |
| VOCs                                                 | Ozone concentrations | VOC dose ( $\mu\text{g}$ ) |              |       |              |
|                                                      |                      | 1                          | 10           | 100   | 1000         |
| Benzyl alcohol                                       | 0 ppb vs 80 ppb      | 0.079                      | 0.081        | 0.812 | 0.238        |
|                                                      | 0 ppb vs 120 ppb     | <b>0.018</b>               | 0.064        | 0.198 | 0.431        |
|                                                      | 80 ppb vs 120 ppb    | 0.535                      | 0.917        | 0.304 | 0.700        |
| Linalool oxides                                      | 0 ppb vs 80 ppb      | 0.289                      | 0.560        | 0.960 | 0.229        |
|                                                      | 0 ppb vs 120 ppb     | 0.945                      | 0.064        | 0.511 | 0.450        |
|                                                      | 80 ppb vs 120 ppb    | 0.331                      | 0.211        | 0.489 | 0.056        |
| Linalool mixture                                     | 0 ppb vs 80 ppb      | 0.641                      | <b>0.026</b> | 0.478 | 0.625        |
|                                                      | 0 ppb vs 120 ppb     | 0.187                      | <b>0.007</b> | 0.809 | 0.885        |
|                                                      | 80 ppb vs 120 ppb    | 0.081                      | 0.623        | 0.647 | 0.737        |

**Table S5.** Statistical outputs (p-values) regarding the impact of ozone exposure on antennal sensitivity in bumblebee workers. Significant differences are in bold.

| Multiple pairwise comparisons for 60-min exposure |                    |                            |              |              |              |
|---------------------------------------------------|--------------------|----------------------------|--------------|--------------|--------------|
| Ozone concentrations                              |                    | VOC dose ( $\mu\text{g}$ ) |              |              |              |
|                                                   |                    | 1                          | 10           | 100          | 1000         |
| Benzaldehyde                                      | 0 ppb vs 80 ppb    | 0.883                      | 0.686        | 0.769        | 0.907        |
|                                                   | 0 ppb vs 120 ppb   | 0.574                      | <b>0.023</b> | <b>0.002</b> | <b>0.026</b> |
|                                                   | 0 ppb vs 200 ppb   | 0.658                      | 0.244        | <b>0.048</b> | <b>0.045</b> |
|                                                   | 80 ppb vs 120 ppb  | 0.678                      | 0.061        | <b>0.006</b> | <b>0.034</b> |
|                                                   | 80 ppb vs 200 ppb  | 0.768                      | 0.446        | 0.092        | 0.059        |
|                                                   | 120 ppb vs 200 ppb | 0.905                      | 0.265        | 0.275        | 0.819        |
| R-Linalool                                        | 0 ppb vs 80 ppb    | 0.723                      | 0.460        | 0.455        | 0.663        |
|                                                   | 0 ppb vs 120 ppb   | 0.527                      | 0.111        | <b>0.012</b> | <b>0.014</b> |
|                                                   | 0 ppb vs 200 ppb   | 0.426                      | 0.122        | <b>0.014</b> | <b>0.004</b> |
|                                                   | 80 ppb vs 120 ppb  | 0.781                      | 0.392        | 0.077        | <b>0.044</b> |
|                                                   | 80 ppb vs 200 ppb  | 0.658                      | 0.419        | 0.086        | <b>0.013</b> |
|                                                   | 120 ppb vs 200 ppb | 0.869                      | 0.961        | 0.956        | 0.643        |
| Nonanal                                           | 0 ppb vs 80 ppb    | 0.752                      | 0.956        | 0.816        | 0.380        |
|                                                   | 0 ppb vs 120 ppb   | 0.874                      | 0.687        | <b>0.043</b> | 0.300        |
|                                                   | 0 ppb vs 200 ppb   | 0.839                      | 0.526        | <b>0.037</b> | 0.159        |
|                                                   | 80 ppb vs 120 ppb  | 0.875                      | 0.728        | 0.074        | 0.056        |
|                                                   | 80 ppb vs 200 ppb  | 0.604                      | 0.563        | 0.064        | <b>0.022</b> |
|                                                   | 120 ppb vs 200 ppb | 0.718                      | 0.817        | 0.950        | 0.708        |

  

| Multiple pairwise comparisons for 180-min exposure |                    |                            |       |              |              |
|----------------------------------------------------|--------------------|----------------------------|-------|--------------|--------------|
| Ozone concentrations                               |                    | VOC dose ( $\mu\text{g}$ ) |       |              |              |
|                                                    |                    | 1                          | 10    | 100          | 1000         |
| Benzaldehyde                                       | 0 ppb vs 80 ppb    | 0.915                      | 0.814 | 0.243        | 0.144        |
|                                                    | 0 ppb vs 120 ppb   | 0.943                      | 0.524 | 0.077        | 0.052        |
|                                                    | 0 ppb vs 200 ppb   | 0.980                      | 0.386 | <b>0.031</b> | <b>0.012</b> |
|                                                    | 80 ppb vs 120 ppb  | 0.859                      | 0.688 | 0.549        | 0.629        |
|                                                    | 80 ppb vs 200 ppb  | 0.935                      | 0.527 | 0.319        | 0.292        |
|                                                    | 120 ppb vs 200 ppb | 0.923                      | 0.818 | 0.691        | 0.568        |
| R-Linalool                                         | 0 ppb vs 80 ppb    | 0.947                      | 0.993 | 0.291        | <b>0.025</b> |
|                                                    | 0 ppb vs 120 ppb   | 0.904                      | 0.622 | 0.074        | 0.082        |
|                                                    | 0 ppb vs 200 ppb   | 0.764                      | 0.421 | <b>0.032</b> | <b>0.003</b> |
|                                                    | 80 ppb vs 120 ppb  | 0.851                      | 0.616 | 0.462        | 0.611        |
|                                                    | 80 ppb vs 200 ppb  | 0.713                      | 0.416 | 0.274        | 0.490        |
|                                                    | 120 ppb vs 200 ppb | 0.857                      | 0.755 | 0.720        | 0.231        |

---

|         |                    |       |       |       |       |
|---------|--------------------|-------|-------|-------|-------|
| Nonanal | 0 ppb vs 80 ppb    | 0.796 | 0.757 | 0.695 | 0.538 |
|         | 0 ppb vs 120 ppb   | 0.955 | 0.919 | 0.436 | 0.737 |
|         | 0 ppb vs 200 ppb   | 0.801 | 0.868 | 0.294 | 0.491 |
|         | 80 ppb vs 120 ppb  | 0.753 | 0.681 | 0.699 | 0.780 |
|         | 80 ppb vs 200 ppb  | 0.996 | 0.887 | 0.511 | 0.941 |
|         | 120 ppb vs 200 ppb | 0.757 | 0.788 | 0.786 | 0.724 |

---
